# Supplementary material
Source: PubMed Central journal article supplement (PMC3945743)
Supplement: NIHMS523457-supplement-1.pdf [file NIHMS523457-supplement-1.pdf]

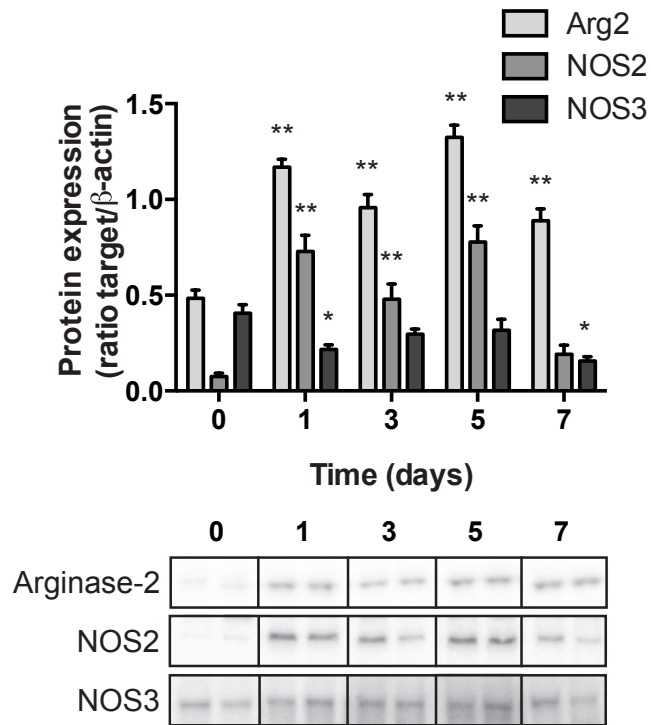

**Supplemental Figure 1.** Increased expression of Arginase and NOS during wound closure. Wounds from wild-type mice ( $n=4$ ) were harvested at days 1, 3, 5, 7, lysed and Western blotted for Arginase-2, NOS2 and NOS3 protein. The bar graph shows the ratio of the protein of interest against  $\beta$ -actin ( $au \pm SEM$ ) control with a representative Western blot below.

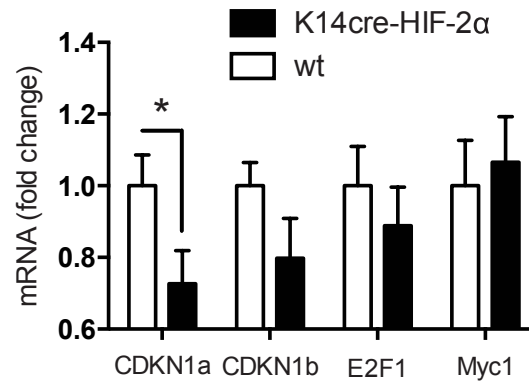

**Supplemental Figure 2. C-Myc target gene expression**

Basal expression of c-myc target genes in skin samples from k14cre-HIF2α or wildtype control mice. QPCR analysis (fold change, mean  $\pm$  SEM) for CDKN1a, CDKN1b, E2F1 and c-myc.

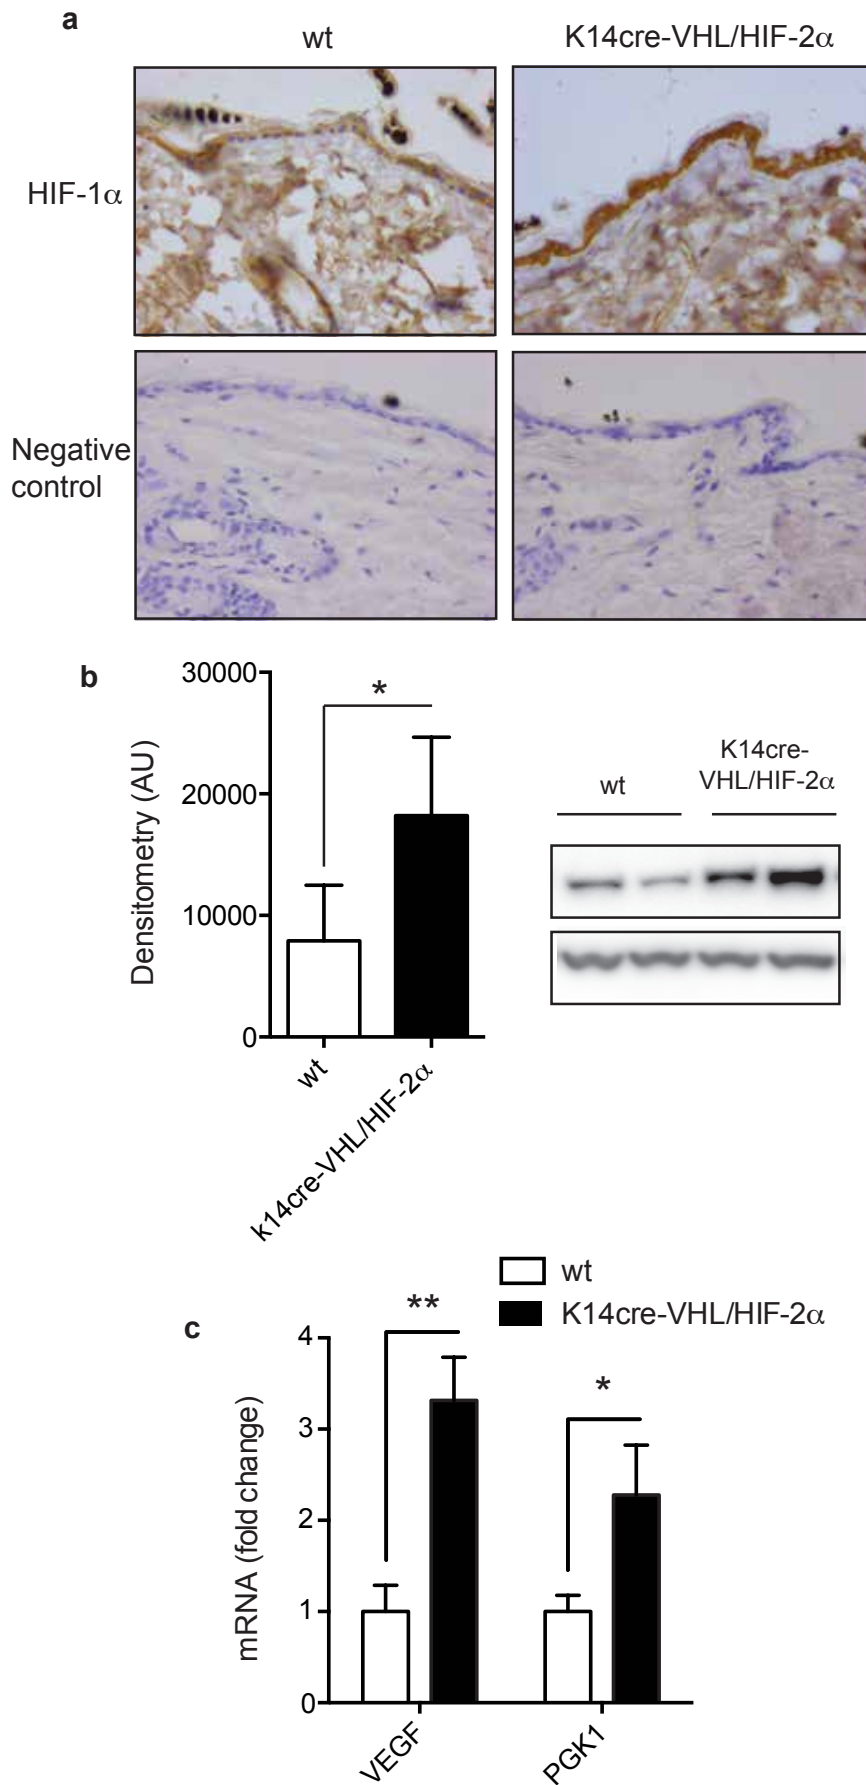

**Supplemental Figure 3.** Increased epidermal HIF-1 $\alpha$  stability in K14cre-VHL/HIF-2 $\alpha$  mouse. (a) Representative photomicrographs showing HIF-1 $\alpha$  immunostaining on skin sections from K14cre-VHL/HIF-2 $\alpha$  and wildtype controls. Negative controls are included below. (b) Western blot analysis for HIF-1 $\alpha$  stability in skin lysates from K14cre-VHL/HIF-2 $\alpha$  and wildtype controls

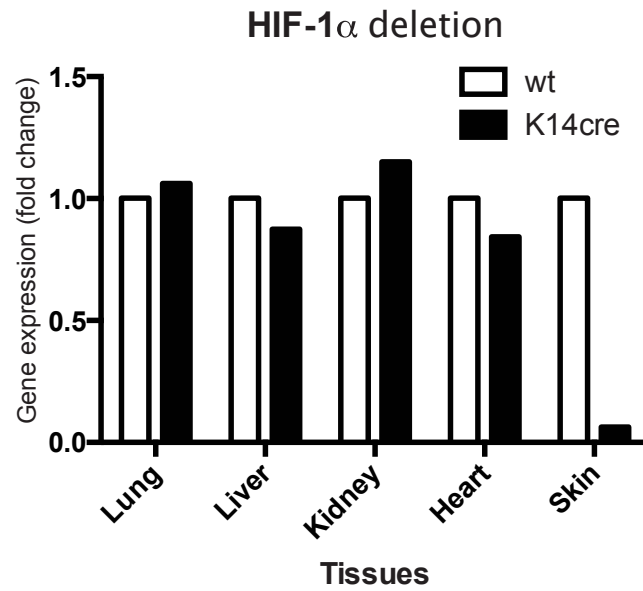

**Supplemental Figure 4.** K14cre deletion efficiency and tissue specificity. Taqman qPCR analysis shows the K14cre mutant to be very efficient in the deletion of HIF-1 $\alpha$  and very specific compared to the other tissues analyzed. Data in bar graph from one experiment shown as fold change in gene expression.
